# Supplementary material
Source: HighWire-hosted journal article supplement (https://bmjopen.bmj.com/content/12/4/e059779)
Supplement: inline-supplementary-material-4 [file inline-supplementary-material-4.pdf]

治験実施計画書番号：CCRC2002

作成日：2021年5月6日第1.1版

医師保管用

## 同意文書

私は、「脈管浸潤を伴う進行肝細胞癌患者を対象としたデュルバルマブ・トレメリムマブと重粒子線治療との併用療法の安全性と有効性を評価する第Ib相臨床試験」に参加するにあたり、以下の内容について説明を受け、十分に理解した上で、自らの自由意思により本治験に参加することに同意します。

- 治験とは
- あなたの病気と治療について
- 治験薬について
- 重粒子治療について
- 治験の目的と方法
- 治験のスケジュール
- 検体（血液、組織）の保管に関して
- 治験への参加予定期間と参加いただく人数
- 試験の参加によって受ける利益
- 予測される不利益および副作用について
- 自由意思による治験の参加といつでも同意の撤回ができること
- 治験に参加しない場合の治療
- 治験参加後の中止について
- 新たに重要な情報が得られた場合について
- 治験に関する健康被害の補償について
- 治験に参加された場合の費用について
- 医療記録の閲覧と参加者の秘密の保全について
- 利益相反について
- 患者さんに守っていただきたいことについて
- 治験を審査する委員会
- 治験に関する相談窓口 連絡先

●肝生検・肝腫瘍生検を行うことについて（治療開始前／治療開始42日以降）

同意します  同意しません

●治験終了後に検体を保管することについて

同意します  同意しません

同意日： \_\_\_\_\_ 年 \_\_\_\_\_ 月 \_\_\_\_\_ 日

本人（署名または記名捺印）： \_\_\_\_\_

担当医師 説明日： \_\_\_\_\_ 年 \_\_\_\_\_ 月 \_\_\_\_\_ 日 署名： \_\_\_\_\_

説明補助者 説明日： \_\_\_\_\_ 年 \_\_\_\_\_ 月 \_\_\_\_\_ 日 署名： \_\_\_\_\_

治験実施計画書番号：CCRC2002

作成日：2021年5月6日第1.1版

病院保管用

## 同意文書

私は、「脈管浸潤を伴う進行肝細胞癌患者を対象としたデュルバルマブ・トレメリムマブと重粒子線治療との併用療法の安全性と有効性を評価する第Ib相臨床試験」に参加するにあたり、以下の内容について説明を受け、十分に理解した上で、自らの自由意思により本治験に参加することに同意します。

- 治験とは
- あなたの病気と治療について
- 治験薬について
- 重粒子治療について
- 治験の目的と方法
- 治験のスケジュール
- 検体（血液、組織）の保管に関して
- 治験への参加予定期間と参加いただく人数
- 試験の参加によって受ける利益
- 予測される不利益および副作用について
- 自由意思による治験の参加といつでも同意の撤回ができること
- 治験に参加しない場合の治療
- 治験参加後の中止について
- 新たに重要な情報が得られた場合について
- 治験に関する健康被害の補償について
- 治験に参加された場合の費用について
- 医療記録の閲覧と参加者の秘密の保全について
- 利益相反について
- 患者さんに守っていただきたいことについて
- 治験を審査する委員会
- 治験に関する相談窓口 連絡先

●肝生検・肝腫瘍生検を行うことについて（治療開始前／治療開始42日以降）

同意します  同意しません

●治験終了後に検体を保管することについて

同意します  同意しません

同意日： \_\_\_\_\_ 年 \_\_\_\_\_ 月 \_\_\_\_\_ 日

本人（署名または記名捺印）： \_\_\_\_\_

担当医師 説明日： \_\_\_\_\_ 年 \_\_\_\_\_ 月 \_\_\_\_\_ 日 署名： \_\_\_\_\_

説明補助者 説明日： \_\_\_\_\_ 年 \_\_\_\_\_ 月 \_\_\_\_\_ 日 署名： \_\_\_\_\_

治験実施計画書番号：CCRC2002

作成日：2021年5月6日第1.1版

患者さん保管用

## 同意文書

私は、「脈管浸潤を伴う進行肝細胞癌患者を対象としたデュルバルマブ・トレメリムマブと重粒子線治療との併用療法の安全性と有効性を評価する第Ib相臨床試験」に参加するにあたり、以下の内容について説明を受け、十分に理解した上で、自らの自由意思により本治験に参加することに同意します。

- 治験とは
- あなたの病気と治療について
- 治験薬について
- 重粒子治療について
- 治験の目的と方法
- 治験のスケジュール
- 検体（血液、組織）の保管に関して
- 治験への参加予定期間と参加いただく人数
- 試験の参加によって受ける利益
- 予測される不利益および副作用について
- 自由意思による治験の参加といつでも同意の撤回ができること
- 治験に参加しない場合の治療
- 治験参加後の中止について
- 新たに重要な情報が得られた場合について
- 治験に関する健康被害の補償について
- 治験に参加された場合の費用について
- 医療記録の閲覧と参加者の秘密の保全について
- 利益相反について
- 患者さんに守っていただきたいことについて
- 治験を審査する委員会
- 治験に関する相談窓口 連絡先

●肝生検・肝腫瘍生検を行うことについて（治療開始前／治療開始42日以降）

同意します  同意しません

●治験終了後に検体を保管することについて

同意します  同意しません

同意日： \_\_\_\_\_ 年 \_\_\_\_\_ 月 \_\_\_\_\_ 日

本人（署名または記名捺印）： \_\_\_\_\_

担当医師 説明日： \_\_\_\_\_ 年 \_\_\_\_\_ 月 \_\_\_\_\_ 日 署名： \_\_\_\_\_

説明補助者 説明日： \_\_\_\_\_ 年 \_\_\_\_\_ 月 \_\_\_\_\_ 日 署名： \_\_\_\_\_
